# Supplementary material for: FGFR1 mutations cause Hartsfield syndrome, the unique association of holoprosencephaly and ectrodactyly
Source: PubMed Central journal article supplement — J Med Genet. 2013 Jun 28;50(9):585–92. doi: 10.1136/jmedgenet-2013-101603 (PMC3756455; doi:10.1136/jmedgenet-2013-101603), 2013-06-28
Supplement: jmedgenet-2013-101603-s1.pdf [file jmedgenet-2013-101603-s1.pdf]

## Supplementary Data

### ***FGFR1* mutations cause Hartsfield syndrome, the rare association of holoprosencephaly and ectrodactyly.**

Nicolas Simonis,<sup>1</sup> Isabelle Migeotte,<sup>2,3</sup> Nelle Lambert,<sup>2,3</sup> Camille Perazzolo,<sup>2</sup> Deepthi C. de Silva,<sup>4</sup> Boyan Dimitrov,<sup>5</sup> Claudine Heinrichs,<sup>6</sup> Sandra Janssens,<sup>7</sup> Bronwyn Kerr,<sup>8</sup> Geert Mortier,<sup>9</sup> Guy Van Vliet,<sup>10</sup> Philippe Lepage,<sup>6</sup> Georges Casimir,<sup>6</sup> Marc Abramowicz,<sup>2,3</sup> Guillaume Smits,<sup>3,6,11,\*</sup> and Catheline Vilain,<sup>3,6,11,\*\*</sup>

<sup>1</sup> Laboratoire de Bioinformatique des Génomes et des Réseaux (BiGRé), Université Libre de Bruxelles (ULB), 1050 Brussels, Belgium.

<sup>2</sup> Institut de Recherche Interdisciplinaire en Biologie Humaine et Moléculaire (IRIBHM), Université Libre de Bruxelles (ULB), 1070 Brussels, Belgium.

<sup>3</sup> ULB Center of Human Genetics, Hôpital Erasme, Université Libre de Bruxelles (ULB), 1070 Brussels, Belgium.

<sup>4</sup> Department of Physiology, Faculty of Medicine, University of Kelaniya, Ragama, Sri Lanka.

<sup>5</sup> Department of Clinical Genetics, Guy's Hospital, London SE1 9RT, United Kingdom.

<sup>6</sup> Department of Paediatrics, Hôpital Universitaire des Enfants Reine Fabiola (HUDERF), Université Libre de Bruxelles (ULB), 1020 Brussels, Belgium

<sup>7</sup> Center for Medical Genetics Ghent, Ghent University Hospital, 9000 Ghent, Belgium.

<sup>8</sup> Manchester Academic Health Science Centre, University of Manchester, Central Manchester University Hospitals NHS Foundation Trust, Manchester M139WL, United Kingdom.

<sup>9</sup> Center for Medical Genetics, Antwerp University Hospital and University of Antwerp, 2650 Antwerp, Belgium.

<sup>10</sup> Endocrinology Service and Research Center, Hôpital Sainte-Justine and Department of Pediatrics, Université de Montréal, Montréal, H3T 1C5 Québec, Canada.

<sup>11</sup>These authors jointly directed this work.

\*Correspondence: [guillaume.smits@huderf.be](mailto:guillaume.smits@huderf.be)

\*\*Correspondence: [cavilain@ulb.ac.be](mailto:cavilain@ulb.ac.be)

**Table S1**

| Reference                  | Sex | Age            | HPE                                | Ectrodactyly                                                                                                                     | CLP                                    | Face                                           | Eye                     | Ears                | Endocrine              | Additional                                                       |
|----------------------------|-----|----------------|------------------------------------|----------------------------------------------------------------------------------------------------------------------------------|----------------------------------------|------------------------------------------------|-------------------------|---------------------|------------------------|------------------------------------------------------------------|
| Hartsfield <sup>1</sup>    | M   | Died at 7 days | Lobar                              | Ectrodactyly, with oligodactyly of both hands                                                                                    | CP                                     | Absence of right nostril, marked hypertelorism | Microphthalmia          | Malformed ears      | -                      | Radial aplasia, abnormal skull, abnormal sutures                 |
| Young <sup>2</sup>         | M   | TOP at 18w     | Lobar                              | RH: polysyndactyly with central cleft<br>LH: syndactyly<br>F: ectro-syndactyly                                                   | Bilateral CLP                          | Hypertelorism                                  | -                       | Rudimentary low set | -                      | -                                                                |
| Imaizumi <sup>3</sup>      | M   | 8m             | Lobar                              | RH: absence of 3 <sup>rd</sup> digit, syndactyly<br>LH: hypoplastic 3 <sup>rd</sup> digit, syndactyly<br>F: 2 digits, syndactyly | Bilateral CLP                          | Hypertelorism                                  | -                       | Low set, dysmorphic | CDI                    | -                                                                |
| Corona-Rivera <sup>4</sup> | M   | 3y             | Semilobar + pachygyria             | Ectrodactyly of feet                                                                                                             | Lateral cleft of the labial commissure | Hypertelorism                                  | Microphthalmia coloboma | Low set             | -                      | Prominent metopic suture, abnormal skull, abnormal hair pattern  |
| Abdel-Meguid <sup>5</sup>  | M   | 1y             | Lobar                              | Ectrodactyly                                                                                                                     | -                                      | Hypotelorism, synophris                        | -                       | -                   | CDI                    | -                                                                |
| König <sup>6</sup>         | M   | 9y             | Lobar                              | RH: hypoplastic 3 <sup>rd</sup> phalanges<br>LH: ectrodactyly<br>F: 4 digits syndactyly                                          | Bilateral CLP                          | -                                              | -                       | -                   | CDI, HH, GH deficiency | Micropenis, cryptorchidism                                       |
| Zechi-Ceide <sup>7</sup>   | M   | 3y             | Semilobar                          | Ectrodactyly, hypoplastic 2 <sup>nd</sup> (R and LH) and 3 <sup>rd</sup> digits (RH). F: 3 digits, partial 4-5 syndactyly        | Bilateral CLP                          | NI                                             | -                       | -                   | -                      | Micropenis, cryptorchidism                                       |
| Vilain <sup>8</sup>        | M   | TOP at 36w     | Arhinencephaly, vermian hypoplasia | Ectrodactyly with 5 fingers on both hands, 3 toes on both feet.                                                                  | Left labial and gingival cleft.        | -                                              | -                       | -                   | -                      | -                                                                |
| Vilain <sup>*8</sup>       | M   | 19y            | Lobar                              | Ectrodactyly of 4 limbs                                                                                                          | Bilateral CLP                          | -                                              | -                       | -                   | CDI, HH, anosmia       | Micropenis, cryptorchidism                                       |
| Vilain <sup>*8</sup>       | M   | 1m             | Alobar                             | Severe oligodactyly of hands and feet                                                                                            | Median CLP                             | Hypotelorism                                   | -                       | Low set, small      | -                      | Abnormal skull with prominent and widely patent sutures          |
| Vilain <sup>*8</sup>       | M   | 29y            | Lobar                              | Ectrodactyly (hands mildly affected)                                                                                             | -                                      | -                                              | -                       | -                   | CID, HH                | Micropenis, cryptorchidism                                       |
| Vilain <sup>*8</sup>       | M   | 12y            | Semilobar                          | Ectrodactyly, camptodactyly, bifurcation of thumbs                                                                               | Bilateral CLP                          | -                                              | -                       | Pre-auricular tags  | -                      | Micropenis, cryptorchidism                                       |
| Keaton <sup>9</sup>        | M   |                | Semilobar                          | Bilateral ectrodactyly of hands, absence of central ray                                                                          | Bilateral CLP                          | -                                              | -                       | Bilateral microtia  | -                      | Sacral dysgenesis, micropenis                                    |
| Keaton <sup>9</sup>        | F   | TOP            | Lobar                              | RH ectrodactyly with absent middle ray                                                                                           | Midline facial cleft, absence of nose  | -                                              | -                       | -                   | -                      | Hemi-vertebrae, lordosis, kyphosis, interrupted aortic arch, VSD |
| Keaton <sup>9</sup>        | F   |                | Lobar                              | Ectrodactyly of 4                                                                                                                | High palate                            | Hypotelorism                                   | -                       | Dysplastic          | CDI                    | -                                                                |

|                               |   |     |       |                                                                                         |          |   |   |                 |         |                             |
|-------------------------------|---|-----|-------|-----------------------------------------------------------------------------------------|----------|---|---|-----------------|---------|-----------------------------|
|                               |   |     |       | limbs with absence of digits 2-4                                                        |          |   |   | protruding ears |         |                             |
| Metwalley Kalil <sup>10</sup> | F | 11m | Lobar | Ectrodactyly                                                                            | Right CL | - | - | -               |         | Sparse hypo-pigmented hairs |
| Takenouchi <sup>11</sup>      | M | 8y  | Lobar | Ectrodactyly. H : 4 fingers, gap between the 2 <sup>nd</sup> and 3 <sup>rd</sup> digits | CLP      | - | - | -               | CDI, HH |                             |

**Table S1. Description of the previously reported patients with Harstfield syndrome.** M: male, F: female. HPE: holoprosencephaly. CLP: cleft lip and palate, CL: cleft lip, CP: cleft palate. NI: normal. TOP: termination of pregnancy. RH: right hand, LH: left hand, RF: right foot, LF: left foot. HH: hypogonadotropic hypogonadism, CDI: central diabetes insipidus, GH: growth hormone. VSD: ventricular septal defect, \* present report.

**Table S2**

| Exon  | Product size | Forward primer       | Reverse Primer          |
|-------|--------------|----------------------|-------------------------|
| 1     | 242          | CCTTCTATTTGGGGACTCCG | GCAACTTAAAAGGAGCACAGAAC |
| 2     | 403          | CTCCCTGTCTTCCTCTCTCG | CACCTTCCTCTGAACTGGC     |
| 3     | 227          | GGCTTCCAGGACACACCTC  | GTGCACCTGGGTTCTCTC      |
| 4     | 231          | TCCGTGTTTCATCTGGAAGT | CTCTTAAACCCAATGCCAG     |
| 5     | 290          | CTGACCAGCTGCTCCTCTC  | GGAATTCCTAACTCGGCCTC    |
| 6     | 264          | GGCCTGCATTTTCCTCTG   | CCTAAGAAACCTGGACACCC    |
| 7     | 561          | GTGAGCCCACCCCTCTTTAG | GTCCAAATGCCTTCCTTG      |
| 8     | 284          | AAAGTTACACGGGAGCAACG | CAGCTTGGGGCCTACATC      |
| 9     | 457          | TTTCTGTCTCCTTCCCTTGC | GAGGCAGGTGTACGGGTG      |
| 10    | 341          | TTGCTTTTCTAATGGAGCGG | AGGGCATTAGAGGCCAG       |
| 11    | 279          | AGAATGGGAAGGAGTCACCC | CACACCTTCCACCACTAGAATAG |
| 12    | 259          | ACAGAGAGGTGGAGATGGGG | CTGTTTGCTTGAATGGGAC     |
| 13    | 249          | CCTTAGCCTTTATCCTGCCC | GAGGCCTTGGGACTGATACC    |
| 14    | 349          | CTTTGAGGTGAAGCCAAACC | CGCCACCACAAGATGATAAG    |
| 15    | 240          | AGAGCCTTCCAGCTCCCTC  | ACCCCACTCCTTGCTTCTC     |
| 16-17 | 606          | GTCCCTTCCCACCTGTGC   | CTCAAGCCCACTTGTCC       |
| 18    | 255          | AAGAGTGGGCTTGAGGGG   | GCTCAGGGAGGTGCGTG       |
| 19    | 522          | TGACCTCCAACCAGGTAAGG | GATCTGCCTCTTGCACCTC     |

**Table S2. List of primers for FGFR1 Sanger sequencing.**

**Table S3**

| Pos  | Ref AA | Mut AA | Disease    | Additional clinical features                                                                                                                                                                       | Reference               | Comments                                                                                     |
|------|--------|--------|------------|----------------------------------------------------------------------------------------------------------------------------------------------------------------------------------------------------|-------------------------|----------------------------------------------------------------------------------------------|
| 48   | G      | S      | IHH        |                                                                                                                                                                                                    | Trarbach <sup>12</sup>  | Sporadic IHH and normal olfactory sense                                                      |
| 77   | N      | K      | KS         |                                                                                                                                                                                                    | Dode <sup>13</sup>      | Present in controls too                                                                      |
| 78   | R      | C      | KS         | Cryptorchidism, micropenis                                                                                                                                                                         | Pitteloud <sup>14</sup> |                                                                                              |
| 97   | G      | D      | KS         |                                                                                                                                                                                                    | Dode <sup>15</sup>      |                                                                                              |
| 99   | Y      | C      | IHH        | HH reversal                                                                                                                                                                                        | Raivio <sup>16</sup>    |                                                                                              |
| 99   | Y      | C      | KS         |                                                                                                                                                                                                    | Dode <sup>15</sup>      |                                                                                              |
| 101  | C      | F      | KS         | CP, facial dysmorphism, ASD                                                                                                                                                                        | Dode <sup>13</sup>      |                                                                                              |
| 102  | V      | fs     | KS         |                                                                                                                                                                                                    | Dode <sup>15</sup>      | c.303-304insCC                                                                               |
| 102  | V      | I      | KS         |                                                                                                                                                                                                    | Albuisson <sup>17</sup> |                                                                                              |
| 102  | V      | I      | KS         | Cryptorchidism, micropenis                                                                                                                                                                         | Pitteloud <sup>14</sup> |                                                                                              |
| 107  | S      | X      | KS         |                                                                                                                                                                                                    | Sato <sup>18</sup>      |                                                                                              |
| 112  | T      | T      | SOD-like   | HH, GH deficiency, CCA, eye defects                                                                                                                                                                | Raivio <sup>19</sup>    |                                                                                              |
| 117  | N      | S      | IHH        |                                                                                                                                                                                                    | Raivio <sup>16</sup>    | Digenic GNRHR                                                                                |
| 129  | D      | A      | KS         | CP                                                                                                                                                                                                 | Albuisson <sup>17</sup> |                                                                                              |
| 165* | L      | S      | Hartsfield |                                                                                                                                                                                                    | This study              |                                                                                              |
| 167* | A      | S      | KS         | CP, CCA, unilateral hearing loss, fusion of the fourth and fifth metacarpal bones                                                                                                                  | Dode <sup>15</sup>      |                                                                                              |
| 178  | C      | S      | KS         | Cryptorchidism, micropenis, hypoplasia of olfactory bulbs, CP, dental agenesis, external ear agenesis, right mandibular hypoplasia, thoracic dystrophia, failure to thrive, unique central incisor | Zenaty <sup>20</sup>    |                                                                                              |
| 191* | L      | S      | Hartsfield |                                                                                                                                                                                                    | This study              |                                                                                              |
| 197  | F      | L      | KS         |                                                                                                                                                                                                    | Sykiotis <sup>21</sup>  |                                                                                              |
| 224  | D      | H      | KS         | Cryptorchidism, micropenis                                                                                                                                                                         | Pitteloud <sup>14</sup> |                                                                                              |
| 228  | Y      | D      | IHH        | Osteoporosis                                                                                                                                                                                       | Raivio <sup>16</sup>    |                                                                                              |
| 237  | G      | D      | KS         | Occulo-motor apraxia, dental agenesis, bilateral cryptorchidism, synkinesia.                                                                                                                       | Pitteloud <sup>14</sup> |                                                                                              |
| 237  | G      | S      | IHH/KS     | Bilateral cryptorchidism                                                                                                                                                                           | Pitteloud <sup>22</sup> | One proband with IHH, brother with KS and bilateral cryptorchidism, father with anosmia only |
| 237  | G      | S      | KS         | Bilateral cryptorchidism, occulo-motor apraxia, dental agenesis, synkinesia                                                                                                                        | Pitteloud <sup>14</sup> |                                                                                              |
| 239  | I      | T      | IHH        | HH reversal                                                                                                                                                                                        | Raivio <sup>16</sup>    | Digenic PROKR2                                                                               |
| 245  | L      | P      | KS         | CLP                                                                                                                                                                                                | Trarbach <sup>12</sup>  | KS "+"                                                                                       |

|         |    |          |          |                                                                                                      |                                  |                                                                                                                       |
|---------|----|----------|----------|------------------------------------------------------------------------------------------------------|----------------------------------|-----------------------------------------------------------------------------------------------------------------------|
| 250     | R  | Q        | IHH      | Micropenis                                                                                           | Falardeau <sup>23</sup>          | Digenic FGF8                                                                                                          |
| 250     | R  | W        | KS       | Mental deficiency, epilepsy                                                                          | Trarbach <sup>12</sup>           | 2 unrelated cases: familial and sporadic Kallmann syndrome respectively, only one with mental deficiency and epilepsy |
| 250     | R  | W        | KS       |                                                                                                      | Dode <sup>13</sup>               |                                                                                                                       |
| 254     | R  | Q        | KS       |                                                                                                      | Pitteloud <sup>14</sup>          |                                                                                                                       |
| 254     | R  | W        | IHH      |                                                                                                      | Koika <sup>24</sup>              |                                                                                                                       |
| 270     | G  | D        | KS       |                                                                                                      | Dode <sup>13</sup>               |                                                                                                                       |
| 273     | V  | M        | KS       | CP                                                                                                   | Albuisson <sup>17</sup>          |                                                                                                                       |
| 273     | V  | M        | KS       |                                                                                                      | Pitteloud <sup>14</sup>          |                                                                                                                       |
| 274     | E  | G        | KS       | Cryptorchidism, micropenis, CL, synkinesia                                                           | Pitteloud <sup>14</sup>          |                                                                                                                       |
| 277     | C  | Y        | KS       |                                                                                                      | Dode <sup>15</sup>               |                                                                                                                       |
| 281 282 | SD | del      | KS       | Dental agenesis                                                                                      | Bailleul-Forestier <sup>25</sup> |                                                                                                                       |
| 283     | P  | R        | KS       | Dental agenesis                                                                                      | Dode <sup>13</sup>               |                                                                                                                       |
| 285     | P  | R        | KS       |                                                                                                      | Sykiotis <sup>21</sup>           |                                                                                                                       |
| 312     | K  | K_splice | KS       | Multiple dental agenesis                                                                             | Dode <sup>15</sup>               | c.936G>A, exon 7 (donor splice site), synonymous effect, pathogenicity not formally shown                             |
| 324     | E  | X        | KS       | CP                                                                                                   | Dode <sup>13</sup>               |                                                                                                                       |
| 332     | S  | C        | KS       |                                                                                                      | Dode <sup>13</sup>               |                                                                                                                       |
| 339     | Y  | C        | KS       |                                                                                                      | Pitteloud <sup>14</sup>          |                                                                                                                       |
| 341     | C  | W        | KS       | Dental agenesis, Low testicular volume, Osteopenia of lumbar vertebrae and femoral neck hyperkalemia | Bailleul-Forestier <sup>25</sup> |                                                                                                                       |
| 342     | L  | S        | KS       | CLP, micropenis, clinodactyly                                                                        | Pitteloud <sup>26</sup>          |                                                                                                                       |
| 343     | A  | V        | KS       |                                                                                                      | Trarbach <sup>12</sup>           |                                                                                                                       |
| 346     | S  | C        | KS       |                                                                                                      | Pitteloud <sup>14</sup>          |                                                                                                                       |
| 348     | G  | R        | KS       | CLP, dental agenesis                                                                                 | Bailleul-Forestier <sup>25</sup> |                                                                                                                       |
| 365     | R  | fsX41    | KS       | Dental agenesis                                                                                      | Albuisson <sup>17</sup>          |                                                                                                                       |
| 361     | A  | P_splice | KS       |                                                                                                      | Dode <sup>13</sup>               | c.1081G>C                                                                                                             |
| 366     | P  | L        | KS       | Obesity, sleep disorder                                                                              | Trarbach <sup>12</sup>           | case + paternal aunts with Kallmann syndrome, and his normosmic father                                                |
| 429*    | V  | E        | KS       |                                                                                                      | Sykiotis <sup>21</sup>           | Not in reviewer's comments                                                                                            |
| 439     | S  | fs       | KS       | CLP, hearing loss, coarctation of the aorta                                                          | Dode <sup>13</sup>               | 1317_1318delTG                                                                                                        |
| 450     | S  | F        | SOD-like | HH, CDI, CCA, central incisor, brachydactyly, pre-auricular tags, ASD, VSD                           | Raivio <sup>19</sup>             |                                                                                                                       |
| 470     | R  | L        | IHH      |                                                                                                      | Pitteloud <sup>26</sup>          | Oligogenic GNRHR                                                                                                      |

|     |   |        |            |                                                                                                                                                   |                                  |                                                                                              |
|-----|---|--------|------------|---------------------------------------------------------------------------------------------------------------------------------------------------|----------------------------------|----------------------------------------------------------------------------------------------|
| 483 | P | S      | SOD-like   | CPD, CLP, microphthalmia coloboma                                                                                                                 | Raivio <sup>19</sup>             |                                                                                              |
| 490 | G | R      | Hartsfield |                                                                                                                                                   | This study                       |                                                                                              |
| 520 | A | T      | KS         |                                                                                                                                                   | Albuisson <sup>17</sup>          |                                                                                              |
| 538 | I | V      | KS         | Bilateral cryptorchidism                                                                                                                          | Pitteloud <sup>14</sup>          |                                                                                              |
| 585 | Y | X      | KS         |                                                                                                                                                   | Pitteloud <sup>14</sup>          |                                                                                              |
| 604 | A | T      | KS         | Facial dysmorphism, cryptorchidism, micropenis                                                                                                    | Sarfati <sup>27</sup>            | Oligogenic <i>PROKR2</i>                                                                     |
| 607 | V | M      | KS         | Bimanual synkinesia                                                                                                                               | Dode <sup>15</sup>               |                                                                                              |
| 609 | R | X      | KS         | CLP                                                                                                                                               | Riley <sup>28</sup>              |                                                                                              |
| 613 | Y | fsX42  | KS         |                                                                                                                                                   | Albuisson <sup>17</sup>          |                                                                                              |
| 618 | K | fsX654 | KS         | Cubitus valgus                                                                                                                                    | Trarbach <sup>12</sup>           | 1852_1853delAA                                                                               |
| 618 | K | N      | IHH        | Frontal bossing                                                                                                                                   | Raivio <sup>16</sup>             | Oligogenic <i>GNRHR</i>                                                                      |
| 621 | H | R      | KS         | CP, 6 toes (right foot) + 4 toes (left foot), corpus callosum agenesis                                                                            | Dode <sup>13</sup>               |                                                                                              |
| 622 | R | G      | KS         | Cryptorchidism, multiple fusion of metacarpal bones on both hands and feet, dental agenesis, unilateral external ear hypoplasia, Bartter syndrome | Zenaty <sup>20</sup>             |                                                                                              |
| 622 | R | Q      | KS         | Cryptorchidism, cleft palate, micropenis, dental agenesis                                                                                         | Zenaty <sup>20</sup>             |                                                                                              |
| 622 | R | X      | KS         | CL or CP                                                                                                                                          | Dode <sup>15</sup>               |                                                                                              |
| 622 | R | X      | KS         |                                                                                                                                                   | Pitteloud <sup>14</sup>          | Partial puberty and a subsequent reversal of HH                                              |
| 623 | D | Y      | Hartsfield |                                                                                                                                                   | This study                       | Required for catalysis <sup>29</sup>                                                         |
| 628 | N | K      | Hartsfield |                                                                                                                                                   | This study                       |                                                                                              |
| 657 | T | fs     | KS         |                                                                                                                                                   | Dode <sup>15</sup>               | c.1970-1971delCA                                                                             |
| 659 | N | splice | KS         |                                                                                                                                                   | Dode <sup>13</sup>               | c.1977+1G>A                                                                                  |
| 661 | R | X      | KS         |                                                                                                                                                   | Dode <sup>13</sup>               |                                                                                              |
| 666 | W | R      | KS         | CP                                                                                                                                                | Dode <sup>15</sup>               |                                                                                              |
| 671 | A | P      |            | Clinodactily, osteopenia                                                                                                                          | Raivio <sup>16</sup>             |                                                                                              |
| 680 | Q | X      | IHH        | father has CP                                                                                                                                     | Pitteloud <sup>22</sup>          | Brother with nIHH, and his father with delayed puberty, cleft lip palate and dental agenesis |
| 684 | W | splice | KS         |                                                                                                                                                   | Dode <sup>15</sup>               | IVS15+1G>A, intron 15 (donor splice site)                                                    |
| 685 | S | F      | KS         | CLP                                                                                                                                               | Dode <sup>13</sup>               |                                                                                              |
| 687 | G | R      | KS         |                                                                                                                                                   | Sato <sup>30</sup>               |                                                                                              |
| 690 | L | P      | KS         | Dental agenesis, micropenis, microtestes<br>Osteoporosis of vertebrae                                                                             | Bailleul-Forestier <sup>25</sup> |                                                                                              |
| 693 | I | F      | KS         |                                                                                                                                                   | Dode <sup>13</sup>               |                                                                                              |

|         |     |     |            |                                                          |                         |                                        |
|---------|-----|-----|------------|----------------------------------------------------------|-------------------------|----------------------------------------|
| 700     | P   | L   | IHH        |                                                          | Sykiotis <sup>21</sup>  |                                        |
| 703     | G   | R   | KS         |                                                          | Pitteloud <sup>14</sup> |                                        |
| 703     | G   | S   | KS         |                                                          | Pitteloud <sup>14</sup> |                                        |
| 719     | M   | R   | KS         |                                                          | Dode <sup>15</sup>      |                                        |
| 722     | P   | S   | KS         | CL, bimanual synkinesia                                  | Trarbach <sup>12</sup>  |                                        |
| 722 724 | P N | H K | IHH        | Dental agenesis, unilateral cryptorchidism               | Pitteloud <sup>22</sup> | Mother with isolated hyposmia          |
| 725     | C   | Y   | Hartsfield |                                                          | this study              |                                        |
| 730     | Y   | X   | KS         |                                                          | Albuisson <sup>17</sup> |                                        |
| 745     | P   | R   | KS         |                                                          | Sykiotis <sup>21</sup>  | Not in reviewer's comments, oligogenic |
| 745     | P   | S   | KS         |                                                          | Sato <sup>18</sup>      |                                        |
| 764 768 | Q D | H H | IHH        |                                                          | Falardeau <sup>23</sup> | Oligogenic FGF8                        |
| 768     | D   | H   | IHH        |                                                          | Sykiotis <sup>21</sup>  |                                        |
| 772     | P   | S   | KS         | CP, unilateral absence of nasal cartilage, iris coloboma | Dode <sup>15</sup>      |                                        |
| 772     | P   | S   | KS         | bimanual synkinesia                                      | Dode <sup>13</sup>      |                                        |
| 795     | V   | I   | KS         |                                                          | Trarbach <sup>12</sup>  |                                        |
| 822     | R   | C   | KS         |                                                          | Dode <sup>13</sup>      | Present in controls too                |

**Table S3. Known FGFR1 mutations involved in isolated hypogonadotropic deficiency (IHH) / Kallman syndrome (KS)/ Septo-optic-like dysplasia (SOD-like)/ Hartsfield syndrome.** Each line shows 1 case. Pos: Position on the amino acid sequence of Uniprot P11362 isoform 1. Asterisk indicates a homozygous mutation. Ref AA: reference amino acid. Mut AA: mutant amino acid. X for stop codon, splice for splicing variant, fs for frameshift. Disease: KS: Kallman syndrome, IHH: isolated hypogonadotropic hypogonadism, SOD-like: septo-optic-like dysplasia, CCA: corpus callosum agenesis, CDI: central diabetes insipidus, ASD: atrium septum defect, VSD: ventricular septal defect, CPD: combined pituitary deficiency, CP: cleft palate, CLP: cleft lip and palate, CL: cleft lip. This list has been compiled starting from the mutations referenced in Uniprot entry P11362-1 to which we added the missing IHH/KS/SOD *FGFR1* mutations we could find in the literature and the Hartsfield mutations found in this study.

**Table S4**

|                                       | HH   | CDI | Pituitary other                               | Genitalia                                      | Anosmia   | Puberty                                                                                  | Adult                                                   | Arhinen-<br>cephaly                          |            |
|---------------------------------------|------|-----|-----------------------------------------------|------------------------------------------------|-----------|------------------------------------------------------------------------------------------|---------------------------------------------------------|----------------------------------------------|------------|
| Patient 1*<br>(Vilain3) <sup>8</sup>  | NE   | NE  | NE                                            | ?                                              | NA        | NA                                                                                       | NA                                                      | ?                                            | Died at 5y |
| Patient 2 *                           | NE   | NE  | NE                                            | Normal                                         | NE        | NA                                                                                       | NA                                                      | NE                                           | Died at 4y |
| patient 3*<br>(Vilain5) <sup>8</sup>  | NE   | -   | NE                                            | Small                                          | NA        | ?                                                                                        | NA                                                      | ?                                            |            |
| Patient 4*                            | +    | +   | Normal GH<br>secretion, low<br>response to RH | Female                                         | ?         | Oestrogen therapy at<br>15y due to absent<br>menarche, despite<br>early signs of puberty | NA                                                      | ?                                            |            |
| Patient 5*<br>(Vilain 2) <sup>8</sup> | +    | +   | -                                             | Bilateral<br>cryptorchidism<br>Small penis     | Suspected | Induced at 13.3y                                                                         | Tanner P 3                                              | ?                                            |            |
| Patient 6*<br>(Vilain4) <sup>8</sup>  | +    | +   | -                                             | Small penis                                    | NE        | Induced at 14.9y                                                                         | Tanner<br>P5G5<br>(except for 2<br>ml testis<br>volume) | ?                                            |            |
| Patient 7*                            | NA   | NA  | NA                                            | Female                                         | NA        | NA                                                                                       | NA                                                      | NR                                           | TOP        |
| Vilain 1 <sup>8</sup>                 | NA   | NA  | NA                                            | Normal                                         | NA        | NA                                                                                       | NA                                                      | +                                            | TOP        |
| Hartsfield <sup>1</sup>               | NA   | NA  | NA                                            | NR                                             | NA        | NA                                                                                       | NA                                                      | Absence of<br>olfactory<br>bulbs &<br>tracts | Died at 7d |
| Young <sup>2</sup>                    | NA   | NA  | NA                                            | NR                                             | NA        | NA                                                                                       | NA                                                      | NR                                           | TOP        |
| Imaizouni <sup>3</sup>                | NR** | +   | NR                                            | NR                                             | NR        | NA                                                                                       | NA                                                      | NR                                           |            |
| Corona-Rivera <sup>4</sup>            | NR   | NR  | NR                                            | NR                                             | NR        | NA                                                                                       | NA                                                      | NR                                           |            |
| Abdel-Meguid <sup>5</sup>             | NR   | +   | NR                                            | NI                                             | NA        | NA                                                                                       | NA                                                      | NR                                           | Died at 1w |
| Konig <sup>6</sup>                    | +    | +   | SmC/GH extrem<br>low, TSH nl                  | Small penis-<br>hypospadias-<br>cryptorchidism | NE        | NR                                                                                       | NR                                                      | NR                                           |            |
| Zeichi <sup>7</sup>                   | NR   | NR  | NR                                            | Cryptorchidism,<br>small penis                 | NR        | NA                                                                                       | NA                                                      | NR                                           |            |
| Keaton 13 <sup>9</sup>                | NR   | NR  | NR                                            | Micropenis                                     | NR        | NR                                                                                       | NA                                                      | NR                                           |            |
| Keaton 14 <sup>9</sup>                | NR   | NR  | NR                                            | Female nl                                      | NR        | NR                                                                                       | NR                                                      | NR                                           |            |
| Keaton 15 <sup>9</sup>                | NR   | +   | NR                                            | Female                                         | NR        | NR                                                                                       | NR                                                      | NR                                           |            |
| Metwalley <sup>10</sup>               | -*** | -   | -                                             | Female                                         | NR        | NA                                                                                       | NA                                                      | NR                                           |            |
| Takenouchi <sup>11</sup>              | +    | +   | NI except HH                                  | Micropenis,<br>cryptorchidism                  | NR        | NR                                                                                       | NR                                                      | Absence of<br>olfactory<br>bulbs &<br>tracts |            |

**Table S4. Kallmann Syndrome symptoms observed in Hartsfield syndrome patients.** HH: hypogonadotropic hypogonadism, CDI: central diabetes insipidus NA : not applicable, NR : not reported, NE: not evaluated, NI :normal,\* present report,\*\*not reported: but authors say «*endocrinal evaluation performed because of a High serum sodium level and he was diagnosed with diabetes insipidus*» but did not further detail, \*\*\* anterior and posterior pituitary functions tests showed no abnormalities.

**Table S5**



| Gene    | Patient 1 | Patient 3 | Patient 5 | Parents of patient 5 |   | Patient 6 |
|---------|-----------|-----------|-----------|----------------------|---|-----------|
| ABCA1   | 0         | 0         | 0         | 0                    | 0 | 0         |
| APOE    | 0         | 0         | 0         | 0                    | 0 | 0         |
| B9D1    | 0         | 0         | 0         | 0                    | 0 | 0         |
| BMP1    | 0         | 0         | 0         | 0                    | 0 | 0         |
| BMP10   | 0         | 0         | 0         | 0                    | 0 | 0         |
| BMP15   | 0         | 0         | 0         | 0                    | 0 | 0         |
| BMP2    | 0         | 0         | 0         | 0                    | 0 | 0         |
| BMP2K   | 0         | 0         | 0         | 0                    | 0 | 0         |
| BMP3    | 1         | 0         | 0         | 0                    | 0 | 0         |
| BMP4    | 0         | 0         | 0         | 0                    | 0 | 0         |
| BMP5    | 0         | 0         | 0         | 0                    | 0 | 0         |
| BMP6    | 0         | 0         | 0         | 0                    | 0 | 0         |
| BMP7    | 0         | 0         | 0         | 0                    | 0 | 0         |
| BMP8A   | 0         | 0         | 0         | 0                    | 0 | 0         |
| BMP8B   | 0         | 0         | 0         | 0                    | 0 | 0         |
| BMPER   | 0         | 0         | 0         | 0                    | 0 | 0         |
| BMPR1A  | 0         | 0         | 0         | 0                    | 0 | 0         |
| BMPR1B  | 0         | 0         | 0         | 0                    | 0 | 0         |
| BMPR2   | 0         | 0         | 0         | 0                    | 0 | 0         |
| BOC     | 0         | 0         | 0         | 0                    | 0 | 0         |
| BTRC    | 0         | 0         | 0         | 0                    | 0 | 0         |
| CC2D2A  | 0         | 0         | 0         | 0                    | 0 | 0         |
| CDC42   | 0         | 0         | 0         | 0                    | 0 | 0         |
| CDO     | 0         | 0         | 0         | 0                    | 0 | 0         |
| CDON    | 0         | 0         | 0         | 0                    | 0 | 0         |
| CHD7    | 0         | 0         | 0         | 0                    | 0 | 0         |
| CHRD    | 0         | 0         | 0         | 0                    | 0 | 1         |
| DHCR7   | 1         | 0         | 0         | 0                    | 0 | 0         |
| DISP1   | 0         | 0         | 0         | 0                    | 0 | 0         |
| DISP2   | 0         | 0         | 0         | 0                    | 0 | 0         |
| DKK1    | 0         | 0         | 0         | 0                    | 0 | 0         |
| DLX1    | 0         | 0         | 0         | 0                    | 0 | 0         |
| DLX2    | 0         | 0         | 0         | 0                    | 0 | 0         |
| DLX5    | 0         | 0         | 0         | 0                    | 0 | 0         |
| DLX6    | 1         | 0         | 1         | 0                    | 0 | 1         |
| DSS1    | 0         | 0         | 0         | 0                    | 0 | 0         |
| FAM123B | 0         | 0         | 0         | 0                    | 0 | 0         |
| FBXW4   | 0         | 0         | 0         | 0                    | 0 | 0         |
| FGF1    | 0         | 0         | 0         | 0                    | 0 | 0         |
| FGF10   | 0         | 1         | 0         | 0                    | 0 | 0         |
| FGF11   | 0         | 0         | 0         | 0                    | 0 | 0         |
| FGF12   | 0         | 0         | 0         | 0                    | 0 | 0         |
| FGF13   | 0         | 0         | 0         | 0                    | 0 | 0         |
| FGF14   | 0         | 0         | 0         | 0                    | 0 | 0         |

|          |   |   |   |   |   |   |
|----------|---|---|---|---|---|---|
| FGF16    | 0 | 0 | 0 | 0 | 0 | 0 |
| FGF17    | 0 | 0 | 0 | 0 | 0 | 0 |
| FGF18    | 0 | 0 | 0 | 0 | 0 | 0 |
| FGF19    | 0 | 0 | 0 | 0 | 0 | 0 |
| FGF2     | 0 | 0 | 0 | 0 | 0 | 0 |
| FGF20    | 0 | 0 | 0 | 0 | 0 | 0 |
| FGF21    | 0 | 0 | 0 | 0 | 0 | 0 |
| FGF22    | 0 | 0 | 0 | 0 | 0 | 0 |
| FGF23    | 0 | 0 | 0 | 0 | 0 | 0 |
| FGF3     | 0 | 0 | 0 | 0 | 0 | 0 |
| FGF4     | 0 | 0 | 0 | 0 | 0 | 0 |
| FGF5     | 0 | 0 | 0 | 0 | 0 | 0 |
| FGF6     | 0 | 0 | 0 | 0 | 0 | 0 |
| FGF7     | 0 | 0 | 0 | 0 | 0 | 0 |
| FGF8     | 0 | 0 | 0 | 0 | 0 | 0 |
| FGF9     | 0 | 0 | 0 | 0 | 0 | 0 |
| FGFBP1   | 0 | 0 | 0 | 0 | 0 | 0 |
| FGFBP2   | 0 | 0 | 0 | 0 | 0 | 0 |
| FGFBP3   | 0 | 0 | 0 | 0 | 0 | 0 |
| FGFR1    | 1 | 1 | 1 | 0 | 0 | 1 |
| FGFR1OP  | 0 | 0 | 0 | 0 | 0 | 0 |
| FGFR1OP2 | 0 | 0 | 0 | 0 | 0 | 0 |
| FGFR2    | 0 | 0 | 0 | 1 | 0 | 0 |
| FGFR3    | 0 | 0 | 0 | 0 | 0 | 0 |
| FGFR4    | 0 | 0 | 0 | 0 | 0 | 0 |
| FGFRL1   | 0 | 0 | 0 | 0 | 0 | 1 |
| FMN      | 0 | 0 | 0 | 0 | 0 | 0 |
| FOXH1    | 0 | 0 | 0 | 0 | 0 | 0 |
| GAS1     | 0 | 0 | 0 | 0 | 0 | 0 |
| GLI1     | 0 | 0 | 0 | 0 | 1 | 0 |
| GLI2     | 0 | 0 | 0 | 0 | 1 | 2 |
| GLI3     | 0 | 0 | 0 | 0 | 0 | 0 |
| GNRH1    | 0 | 0 | 0 | 0 | 0 | 0 |
| GNRHR    | 0 | 0 | 0 | 0 | 0 | 0 |
| GRE      | 0 | 0 | 0 | 0 | 0 | 0 |
| HIP      | 0 | 0 | 0 | 0 | 0 | 0 |
| HOXA1    | 0 | 0 | 0 | 0 | 0 | 0 |
| HOXA10   | 0 | 0 | 0 | 0 | 0 | 0 |
| HOXA11   | 0 | 0 | 0 | 0 | 0 | 0 |
| HOXA13   | 0 | 0 | 0 | 0 | 0 | 0 |
| HOXA2    | 0 | 0 | 0 | 0 | 0 | 0 |
| HOXA3    | 0 | 0 | 0 | 0 | 0 | 0 |
| HOXA4    | 0 | 0 | 0 | 0 | 0 | 0 |
| HOXA5    | 0 | 0 | 0 | 0 | 0 | 0 |
| HOXA6    | 0 | 0 | 0 | 0 | 0 | 0 |

|        |   |   |   |   |   |   |
|--------|---|---|---|---|---|---|
| HOXA7  | 0 | 0 | 0 | 0 | 0 | 0 |
| HOXA9  | 0 | 0 | 0 | 0 | 0 | 0 |
| HOXB1  | 0 | 0 | 0 | 0 | 0 | 0 |
| HOXB13 | 0 | 0 | 0 | 0 | 0 | 0 |
| HOXB2  | 0 | 0 | 0 | 0 | 0 | 0 |
| HOXB3  | 0 | 0 | 0 | 0 | 0 | 0 |
| HOXB4  | 0 | 0 | 0 | 0 | 0 | 0 |
| HOXB5  | 0 | 0 | 0 | 0 | 0 | 0 |
| HOXB6  | 0 | 0 | 0 | 0 | 0 | 0 |
| HOXB7  | 0 | 0 | 0 | 0 | 0 | 0 |
| HOXB8  | 0 | 0 | 0 | 0 | 0 | 0 |
| HOXB9  | 0 | 0 | 0 | 0 | 0 | 0 |
| HOXC10 | 0 | 0 | 1 | 0 | 0 | 1 |
| HOXC11 | 0 | 0 | 0 | 0 | 0 | 0 |
| HOXC12 | 0 | 0 | 0 | 0 | 0 | 0 |
| HOXC13 | 0 | 0 | 0 | 0 | 0 | 0 |
| HOXC4  | 0 | 0 | 0 | 0 | 0 | 0 |
| HOXC5  | 0 | 0 | 0 | 0 | 0 | 0 |
| HOXC6  | 0 | 0 | 0 | 0 | 0 | 0 |
| HOXC8  | 0 | 0 | 0 | 0 | 0 | 0 |
| HOXC9  | 0 | 0 | 0 | 0 | 0 | 0 |
| HOXD1  | 0 | 0 | 0 | 0 | 0 | 0 |
| HOXD10 | 0 | 0 | 0 | 1 | 0 | 0 |
| HOXD11 | 0 | 0 | 0 | 0 | 0 | 0 |
| HOXD12 | 0 | 0 | 0 | 0 | 0 | 0 |
| HOXD13 | 0 | 0 | 0 | 0 | 0 | 0 |
| HOXD3  | 0 | 0 | 0 | 0 | 0 | 0 |
| HOXD4  | 0 | 0 | 0 | 0 | 0 | 0 |
| HOXD8  | 0 | 0 | 0 | 0 | 0 | 0 |
| HOXD9  | 0 | 0 | 0 | 0 | 0 | 1 |
| HS6ST1 | 0 | 4 | 0 | 1 | 1 | 2 |
| HUWE1  | 0 | 0 | 1 | 0 | 1 | 1 |
| JAG1   | 0 | 0 | 0 | 0 | 0 | 0 |
| JAG2   | 0 | 0 | 0 | 0 | 0 | 0 |
| KAL1   | 0 | 0 | 0 | 0 | 0 | 0 |
| KISS1  | 0 | 0 | 0 | 0 | 0 | 0 |
| KISS1R | 0 | 0 | 0 | 0 | 0 | 0 |
| LRP2   | 1 | 1 | 1 | 1 | 0 | 0 |
| LRP6   | 0 | 0 | 0 | 0 | 0 | 0 |
| MSX1   | 0 | 0 | 0 | 0 | 0 | 0 |
| MSX2   | 0 | 0 | 0 | 0 | 0 | 0 |
| NELF   | 0 | 0 | 0 | 0 | 0 | 0 |
| NKX2.1 | 0 | 0 | 0 | 0 | 0 | 0 |
| NODAL  | 0 | 0 | 0 | 0 | 0 | 0 |
| NOG    | 0 | 0 | 0 | 0 | 0 | 0 |

|        |   |   |   |   |   |   |
|--------|---|---|---|---|---|---|
| PITX1  | 0 | 0 | 0 | 0 | 0 | 0 |
| PITX2  | 0 | 0 | 0 | 0 | 0 | 0 |
| PITX3  | 0 | 0 | 0 | 0 | 0 | 0 |
| PROK2  | 0 | 0 | 0 | 0 | 0 | 0 |
| PTCH1  | 0 | 0 | 0 | 0 | 0 | 0 |
| PTCH2  | 0 | 0 | 0 | 0 | 0 | 0 |
| REDD1  | 0 | 0 | 0 | 0 | 0 | 0 |
| ROR2   | 0 | 1 | 0 | 0 | 0 | 0 |
| SEMA3A | 1 | 0 | 0 | 0 | 0 | 0 |
| SHH    | 0 | 0 | 0 | 0 | 0 | 0 |
| SIX3   | 0 | 0 | 0 | 0 | 0 | 0 |
| SMAD1  | 0 | 0 | 0 | 0 | 0 | 0 |
| SMAD2  | 0 | 0 | 0 | 0 | 0 | 0 |
| SMAD3  | 0 | 0 | 0 | 0 | 0 | 0 |
| SMAD4  | 0 | 0 | 0 | 0 | 0 | 0 |
| SMAD5  | 0 | 0 | 0 | 0 | 0 | 0 |
| SMAD6  | 0 | 0 | 0 | 0 | 0 | 0 |
| SMAD7  | 0 | 0 | 0 | 0 | 0 | 0 |
| SMAD9  | 0 | 0 | 0 | 0 | 0 | 0 |
| SMO    | 0 | 0 | 0 | 0 | 0 | 0 |
| SOX2   | 0 | 0 | 0 | 0 | 0 | 0 |
| SUFU   | 0 | 0 | 0 | 0 | 0 | 0 |
| TAC3   | 0 | 0 | 0 | 0 | 0 | 0 |
| TACR3  | 0 | 0 | 0 | 0 | 0 | 0 |
| TBX1   | 0 | 0 | 0 | 0 | 0 | 0 |
| TBX10  | 0 | 0 | 0 | 0 | 0 | 0 |
| TBX15  | 0 | 0 | 0 | 0 | 0 | 0 |
| TBX18  | 0 | 0 | 0 | 0 | 0 | 1 |
| TBX19  | 0 | 0 | 0 | 0 | 0 | 0 |
| TBX2   | 0 | 0 | 0 | 0 | 1 | 0 |
| TBX20  | 0 | 0 | 0 | 0 | 0 | 0 |
| TBX21  | 0 | 0 | 0 | 0 | 0 | 0 |
| TBX22  | 0 | 0 | 0 | 0 | 0 | 0 |
| TBX3   | 0 | 0 | 0 | 0 | 0 | 0 |
| TBX4   | 0 | 0 | 0 | 0 | 0 | 0 |
| TBX5   | 0 | 0 | 0 | 0 | 0 | 0 |
| TBX6   | 0 | 0 | 0 | 0 | 0 | 0 |
| TBXA2R | 0 | 0 | 0 | 0 | 0 | 0 |
| TBXAS1 | 0 | 0 | 0 | 0 | 0 | 1 |
| TCTN1  | 0 | 0 | 0 | 0 | 0 | 0 |
| TDGF1  | 0 | 0 | 0 | 0 | 0 | 0 |
| TGIF   | 0 | 0 | 0 | 0 | 0 | 0 |
| TGIF1  | 0 | 0 | 0 | 0 | 0 | 0 |
| TP63   | 0 | 0 | 0 | 0 | 0 | 0 |
| TWSG1  | 1 | 0 | 0 | 0 | 0 | 0 |

|        |   |   |   |   |   |   |
|--------|---|---|---|---|---|---|
| WDR11  | 0 | 0 | 0 | 0 | 0 | 0 |
| WNT1   | 0 | 0 | 0 | 0 | 0 | 0 |
| WNT10A | 0 | 0 | 0 | 0 | 0 | 0 |
| WNT10B | 0 | 0 | 0 | 0 | 0 | 1 |
| WNT11  | 0 | 0 | 0 | 0 | 0 | 0 |
| WNT16  | 0 | 0 | 0 | 0 | 0 | 0 |
| WNT2   | 0 | 0 | 0 | 0 | 0 | 0 |
| WNT2B  | 0 | 0 | 0 | 0 | 0 | 0 |
| WNT3   | 0 | 0 | 0 | 0 | 0 | 0 |
| WNT3A  | 0 | 0 | 0 | 0 | 0 | 0 |
| WNT4   | 0 | 0 | 0 | 0 | 0 | 0 |
| WNT5A  | 0 | 0 | 0 | 0 | 0 | 0 |
| WNT5B  | 0 | 0 | 0 | 0 | 0 | 0 |
| WNT6   | 0 | 0 | 0 | 0 | 0 | 0 |
| WNT7A  | 0 | 0 | 0 | 0 | 0 | 0 |
| WNT7B  | 0 | 0 | 0 | 0 | 0 | 0 |
| WNT8A  | 0 | 0 | 0 | 0 | 0 | 0 |
| WNT8B  | 0 | 0 | 0 | 0 | 0 | 0 |
| WNT8C  | 0 | 0 | 0 | 0 | 0 | 0 |
| WNT9A  | 0 | 0 | 0 | 0 | 0 | 0 |
| WNT9B  | 0 | 1 | 0 | 0 | 0 | 0 |
| ZIC2   | 0 | 0 | 0 | 0 | 0 | 0 |

**Table S5. Rare SNPs found in candidate genes for IHH, Holoprosencephaly or split hand-foot malformation.** To explore the potential for multiple genes to be involved in Hartsfield syndrome, we counted the number of rare non synonymous coding SNPs (GMAF unknown or < 0.01) in genes known to be involved in IHH, Holoprosencephaly (HPE) or split hand-foot malformation (SHFM). Genes were selected manually from the OMIM database and scientific literature, including genes involved in limb bud development.

**Table S6**

| Program                         | Version | Parameters                                                                                                                                                                                     |
|---------------------------------|---------|------------------------------------------------------------------------------------------------------------------------------------------------------------------------------------------------|
| BWA                             | 0.6.1   |                                                                                                                                                                                                |
| Picard MarkDuplicates           | 1.54    | REMOVE_DUPLICATES=true,<br>VALIDATION_STRINGENCY=LENIENT,<br>AS=true                                                                                                                           |
| GATK                            | 1.6     |                                                                                                                                                                                                |
| SNPEff                          | 2.0.5   |                                                                                                                                                                                                |
| BEDTools coveragebed            | 2.1.3   |                                                                                                                                                                                                |
| SNPSift                         | 1.3.4   |                                                                                                                                                                                                |
| GATK RealignerTargetCreator     | 1.6     | --known 1000G_phase1.indels --known<br>Mills_and_1000G_gold_standard.indels                                                                                                                    |
| GATK CountCovariates            | 1.6     | -knownSites dbsnp_135 -cov<br>ReadGroupCovariate -cov<br>QualityScoreCovariate -cov<br>CycleCovariate -cov DinucCovariate                                                                      |
| GATK UnifiedGenotyper           | 1.6     | --max_alternate_alleles 12<br>-glm BOTH --dbsnp dbsnp_135<br>-stand_call_conf 30.0<br>-stand_emit_conf 10.0                                                                                    |
| GATK VariantRecalibrator (SNPs) | 1.6     | -an QD -an HaplotypeScore -an<br>MQRankSum -an ReadPosRankSum -<br>an FS -an MQ                                                                                                                |
| GATK VariantFiltration (indels) | 1.6     | --filterExpression "QD < 2.0"<br>--filterName QDFilter<br>--filterName ReadPosRankSum<br>--filterExpression "ReadPosRankSum < -<br>20.0"<br>--filterName FS<br>--filterExpression "FS > 200.0" |

**Table S6. List of parameters for the programs used in the exome analysis.**



**Figure S2**

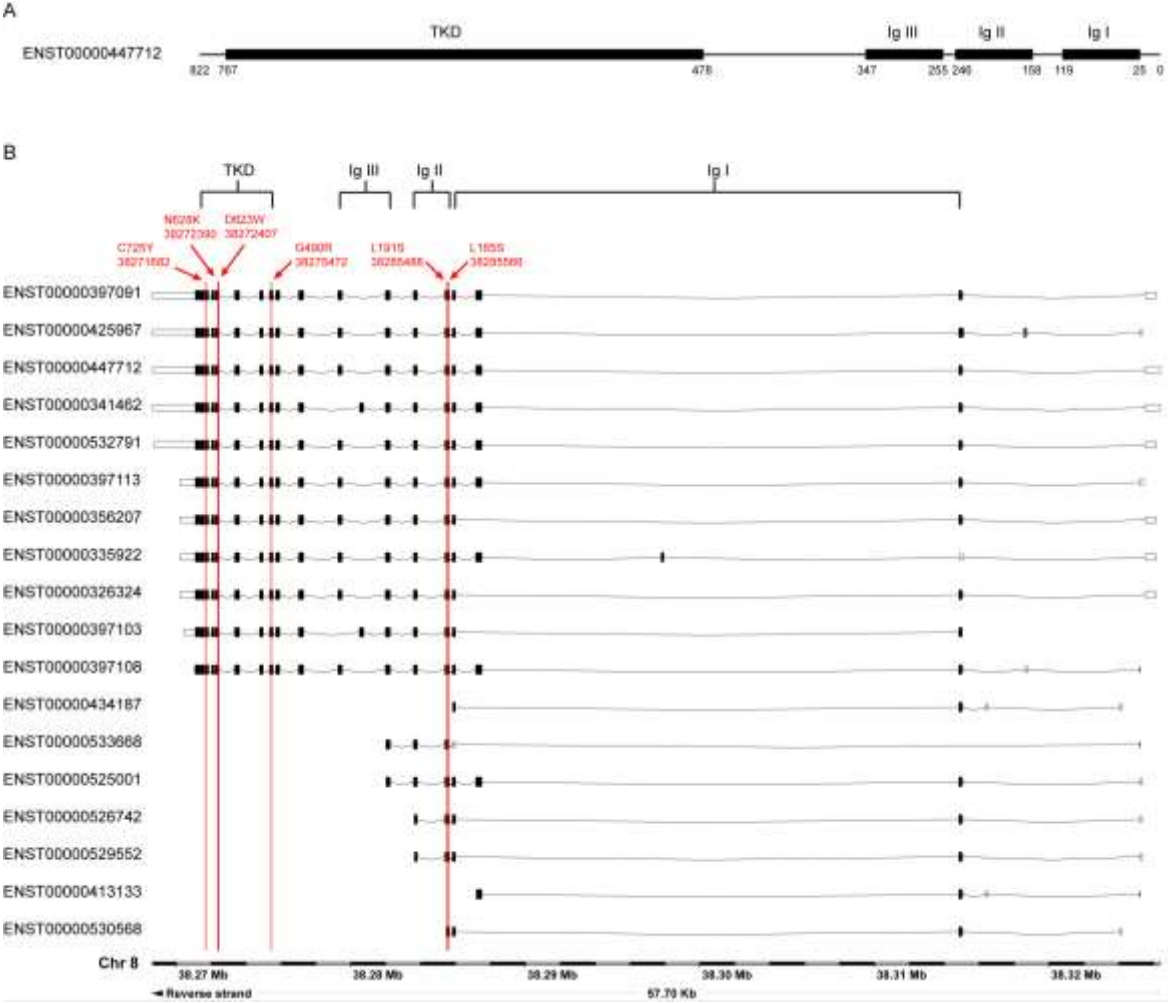

**Figure S2. Positions of Hartsfield syndrome mutations relative to protein-coding FGFR1 isoforms.** (A) Representation of the functional protein domains corresponding to transcript ENST00000447712, according to UNIPROT entry P11362-1. TKD: tyrosine kinase domain, Ig I,II,III: Immunoglobulin domains. (B) Alignment of all protein coding transcripts corresponding to Ensembl Gene ENSG00000077782, along with the corresponding positions of functional protein domains, mutations discovered in this study and position on chromosome 8. This figure was modified from the Ensembl genome browser.



## References

- 1 Hartsfield J, Bixler D, DeMeyer W. Hypertelorism associated with holoprosencephaly and ectrodactyly. *J Clin Dysmorphol* 1984(2):27-31.
- 2 Young ID, Zuccollo JM, Barrow M, Fowlie A. Holoprosencephaly, telecanthus and ectrodactyly: a second case. *Clin Dysmorphol* 1992;1(1):47-51.
- 3 Imaizumi K, Ishii T, Masuno M, Kuroki Y. Association of holoprosencephaly, ectrodactyly, cleft lip/cleft palate and hypertelorism: a possible third case. *Clin Dysmorphol* 1998;7(3):213-6.
- 4 Corona-Rivera A, Corona-Rivera JR, Bobadilla-Morales L, Garcia-Cobian TA, Corona-Rivera E. Holoprosencephaly, hypertelorism, and ectrodactyly in a boy with an apparently balanced de novo t(2;4) (q14.2;q35). *Am J Med Genet* 2000;90(5):423-6.
- 5 Abdel-Meguid N, Ashour AM. Holoprosencephaly and split hand/foot: an additional case with this rare association. *Clin Dysmorphol* 2001;10(4):277-9.
- 6 Konig R, Beeg T, Tariverdian G, Scheffer H, Bitter K. Holoprosencephaly, bilateral cleft lip and palate and ectrodactyly: another case and follow up. *Clin Dysmorphol* 2003;12(4):221-5.
- 7 Zechi-Ceide RM, Ribeiro LA, Raskin S, Bertolacini CD, Guion-Almeida ML, Richieri-Costa A. Holoprosencephaly, ectrodactyly, and bilateral cleft of lip and palate: exclusion of SHH, TGIF, SIX3, GLI2, TP73L, and DHCR7 as candidate genes. *Am J Med Genet A* 2009;149A(6):1277-9.
- 8 Vilain C, Mortier G, Van Vliet G, Dubourg C, Heinrichs C, de Silva D, Verloes A, Baumann C. Hartsfield holoprosencephaly-ectrodactyly syndrome in five male patients: further delineation and review. *Am J Med Genet A* 2009;149A(7):1476-81.
- 9 Keaton AA, Solomon BD, van Essen AJ, Pflieger KM, Slama MA, Martin JA, Muenke M. Holoprosencephaly and ectrodactyly: Report of three new patients and review of the literature. *Am J Med Genet C Semin Med Genet* 2010;154C(1):170-5.
- 10 Metwalley Kalil KA, Fargalley HS. Holoprosencephaly in an Egyptian baby with ectrodactyly-ectodermal dysplasia-cleft syndrome: a case report. *J Med Case Rep* 2012;6(1):35.
- 11 Takenouchi T, Okuno H, Kosaki R, Ariyasu D, Torii C, Momoshima S, Harada N, Yoshihashi H, Takahashi T, Awazu M, Kosaki K. Microduplication of Xq24 and Hartsfield syndrome with holoprosencephaly, ectrodactyly, and clefting. *Am J Med Genet A* 2012;158A(10):2537-41.
- 12 Trarbach EB, Costa EM, Versiani B, de Castro M, Baptista MT, Garmes HM, de Mendonca BB, Latronico AC. Novel fibroblast growth factor receptor 1 mutations in patients with congenital hypogonadotropic hypogonadism with and without anosmia. *J Clin Endocrinol Metab* 2006;91(10):4006-12.
- 13 Dode C, Fouveaut C, Mortier G, Janssens S, Bertherat J, Mahoudeau J, Kottler ML, Chabrolle C, Gancel A, Francois I, Devriendt K, Wolczynski S, Pugeat M, Pineiro-Garcia A, Murat A, Bouchard P, Young J, Delpech M, Hardelin JP. Novel FGFR1 sequence variants in Kallmann syndrome, and genetic evidence that the FGFR1c isoform is required in olfactory bulb and palate morphogenesis. *Hum Mutat* 2007;28(1):97-8.
- 14 Pitteloud N, Meysing A, Quinton R, Acierno JS, Jr., Dwyer AA, Plummer L, Fliers E, Boepple P, Hayes F, Seminara S, Hughes VA, Ma J, Bouloux P, Mohammadi M, Crowley WF, Jr. Mutations in fibroblast growth factor receptor 1 cause Kallmann syndrome with a wide spectrum of reproductive phenotypes. *Mol Cell Endocrinol* 2006;254-255:60-9.

- 15 Dode C, Levilliers J, Dupont JM, De Paepe A, Le Du N, Soussi-Yanicostas N, Coimbra RS, Delmaghani S, Compain-Nouaille S, Baverel F, Pecheux C, Le Tessier D, Cruaud C, Delpech M, Speleman F, Vermeulen S, Amalfitano A, Bachelot Y, Bouchard P, Cabrol S, Carel JC, Delemarre-van de Waal H, Goulet-Salmon B, Kottler ML, Richard O, Sanchez-Franco F, Saura R, Young J, Petit C, Hardelin JP. Loss-of-function mutations in FGFR1 cause autosomal dominant Kallmann syndrome. *Nat Genet* 2003;33(4):463-5.
- 16 Raivio T, Sidis Y, Plummer L, Chen H, Ma J, Mukherjee A, Jacobson-Dickman E, Quinton R, Van Vliet G, Lavoie H, Hughes VA, Dwyer A, Hayes FJ, Xu S, Sparks S, Kaiser UB, Mohammadi M, Pitteloud N. Impaired fibroblast growth factor receptor 1 signaling as a cause of normosmic idiopathic hypogonadotropic hypogonadism. *J Clin Endocrinol Metab* 2009;94(11):4380-90.
- 17 Albuissou J, Pecheux C, Carel JC, Lacombe D, Leheup B, Lapuzina P, Bouchard P, Legius E, Matthijs G, Wasniewska M, Delpech M, Young J, Hardelin JP, Dode C. Kallmann syndrome: 14 novel mutations in KAL1 and FGFR1 (KAL2). *Hum Mutat* 2005;25(1):98-9.
- 18 Sato N, Katsumata N, Kagami M, Hasegawa T, Hori N, Kawakita S, Minowada S, Shimotsuka A, Shishiba Y, Yokozawa M, Yasuda T, Nagasaki K, Hasegawa D, Hasegawa Y, Tachibana K, Naiki Y, Horikawa R, Tanaka T, Ogata T. Clinical assessment and mutation analysis of Kallmann syndrome 1 (KAL1) and fibroblast growth factor receptor 1 (FGFR1, or KAL2) in five families and 18 sporadic patients. *J Clin Endocrinol Metab* 2004;89(3):1079-88.
- 19 Raivio T, Avbelj M, McCabe MJ, Romero CJ, Dwyer AA, Tommiska J, Sykiotis GP, Gregory LC, Diaczok D, Tziaferi V, Elting MW, Padidela R, Plummer L, Martin C, Feng B, Zhang C, Zhou QY, Chen H, Mohammadi M, Quinton R, Sidis Y, Radovick S, Dattani MT, Pitteloud N. Genetic overlap in Kallmann syndrome, combined pituitary hormone deficiency, and septo-optic dysplasia. *J Clin Endocrinol Metab* 2012;97(4):E694-9.
- 20 Zenaty D, Bretones P, Lambe C, Guemas I, David M, Leger J, de Roux N. Paediatric phenotype of Kallmann syndrome due to mutations of fibroblast growth factor receptor 1 (FGFR1). *Mol Cell Endocrinol* 2006;254-255:78-83.
- 21 Sykiotis GP, Plummer L, Hughes VA, Au M, Durrani S, Nayak-Young S, Dwyer AA, Quinton R, Hall JE, Gusella JF, Seminara SB, Crowley WF, Jr., Pitteloud N. Oligogenic basis of isolated gonadotropin-releasing hormone deficiency. *Proc Natl Acad Sci U S A* 2010;107(34):15140-4.
- 22 Pitteloud N, Acierno JS, Jr., Meysing A, Eliseenkova AV, Ma J, Ibrahimi OA, Metzger DL, Hayes FJ, Dwyer AA, Hughes VA, Yialamas M, Hall JE, Grant E, Mohammadi M, Crowley WF, Jr. Mutations in fibroblast growth factor receptor 1 cause both Kallmann syndrome and normosmic idiopathic hypogonadotropic hypogonadism. *Proc Natl Acad Sci U S A* 2006;103(16):6281-6.
- 23 Falardeau J, Chung WC, Beenken A, Raivio T, Plummer L, Sidis Y, Jacobson-Dickman EE, Eliseenkova AV, Ma J, Dwyer A, Quinton R, Na S, Hall JE, Huot C, Alois N, Pearce SH, Cole LW, Hughes V, Mohammadi M, Tsai P, Pitteloud N. Decreased FGF8 signaling causes deficiency of gonadotropin-releasing hormone in humans and mice. *J Clin Invest* 2008;118(8):2822-31.
- 24 Koika V, Varnavas P, Valavani H, Sidis Y, Plummer L, Dwyer A, Quinton R, Kanaka-Gantenbein C, Pitteloud N, Sertedaki A, Dacou-Voutetakis C, Georgopoulos NA. Comparative functional analysis of two fibroblast growth factor receptor 1 (FGFR1) mutations affecting the same residue (R254W and R254Q) in isolated hypogonadotropic hypogonadism (IHH). *Gene* 2013;516(1):146-51.

- 25 Bailleul-Forestier I, Gros C, Zenaty D, Bennaceur S, Leger J, de Roux N. Dental agenesis in Kallmann syndrome individuals with FGFR1 mutations. *Int J Paediatr Dent* 2010;20(4):305-12.
- 26 Pitteloud N, Quinton R, Pearce S, Raivio T, Acierno J, Dwyer A, Plummer L, Hughes V, Seminara S, Cheng YZ, Li WP, Maccoll G, Eliseenkova AV, Olsen SK, Ibrahimi OA, Hayes FJ, Boepple P, Hall JE, Bouloux P, Mohammadi M, Crowley W. Digenic mutations account for variable phenotypes in idiopathic hypogonadotropic hypogonadism. *J Clin Invest* 2007;117(2):457-63.
- 27 Sarfati J, Guiochon-Mantel A, Rondard P, Arnulf I, Garcia-Pinero A, Wolczynski S, Brailly-Tabard S, Bidet M, Ramos-Arroyo M, Mathieu M, Lienhardt-Roussie A, Morgan G, Turki Z, Bremont C, Lespinasse J, Du Boullay H, Chabbert-Buffet N, Jacquemont S, Reach G, De Talence N, Tonella P, Conrad B, Despert F, Delobel B, Brue T, Bouvattier C, Cabrol S, Pugeat M, Murat A, Bouchard P, Hardelin JP, Dode C, Young J. A comparative phenotypic study of kallmann syndrome patients carrying monoallelic and biallelic mutations in the prokineticin 2 or prokineticin receptor 2 genes. *J Clin Endocrinol Metab* 2010;95(2):659-69.
- 28 Riley BM, Mansilla MA, Ma J, Daack-Hirsch S, Maher BS, Raffensperger LM, Russo ET, Vieira AR, Dode C, Mohammadi M, Marazita ML, Murray JC. Impaired FGF signaling contributes to cleft lip and palate. *Proc Natl Acad Sci U S A* 2007;104(11):4512-7.
- 29 Lew ED, Furdui CM, Anderson KS, Schlessinger J. The precise sequence of FGF receptor autophosphorylation is kinetically driven and is disrupted by oncogenic mutations. *Sci Signal* 2009;2(58):ra6.
- 30 Sato N, Hasegawa T, Hori N, Fukami M, Yoshimura Y, Ogata T. Gonadotrophin therapy in Kallmann syndrome caused by heterozygous mutations of the gene for fibroblast growth factor receptor 1: report of three families: case report. *Hum Reprod* 2005;20(8):2173-8.
